# Supplementary material for: Rotational scan digital LAMP for accurate quantitation of nucleic acids
Source: Royal Society of Chemistry journal article supplement (doi:10.1039/d1lc00114k), 2021-01-01
Supplement: d1lc00114k1.pdf [file d1lc00114k1.pdf]

## Supplementary Information

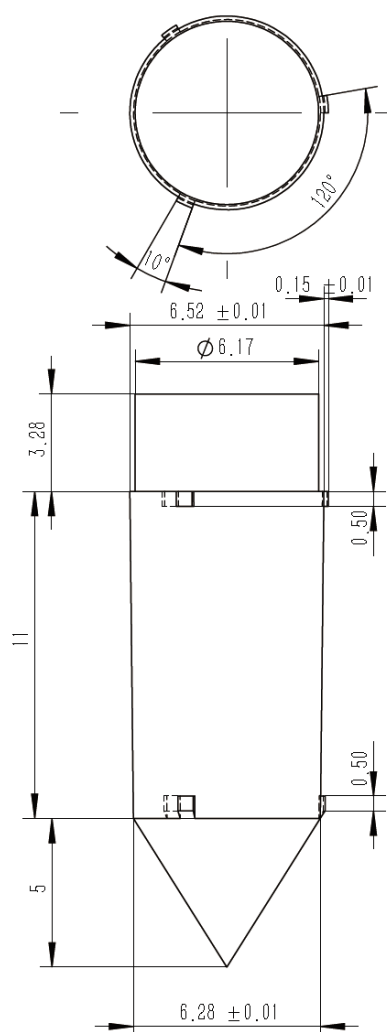

**Figure S1** Drawing of Polycarbonate filler. The insert was made by CNC machining of polycarbonate rod, six claws were placed at the upper and lower position of the imaging surface to keep a uniform space between the rod and inner surface of the centrifuge tube, as well as keep the rod's axis in accordance with that of the centrifuge tube.

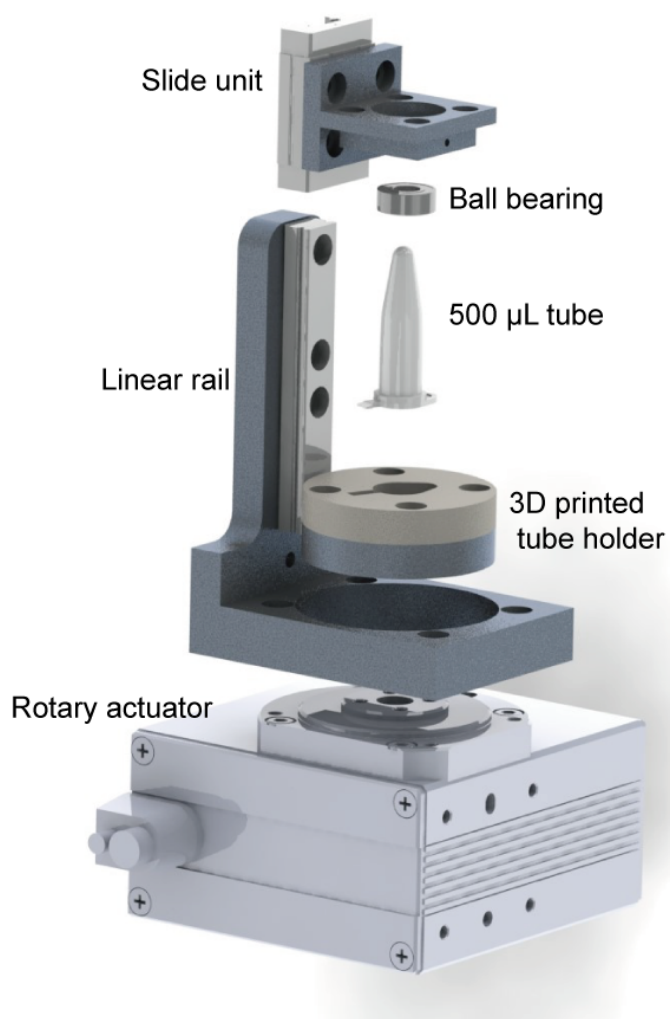

**Figure S2** Mechanical design of rotation system. An RCP2 rotary actuator from IAI Inc. was used as rotation stage. A 3D printed holder was used to fit the cap of the centrifuge holder. A ball bearing (MR106ZZ bearing, NSK Inc.), a slide unit and linear rail (ML9C1S1, IKO Inc.), together with customized CNC parts held the hemisphere bottom of the tube, keeping rotation axis coincide with the tube axis.

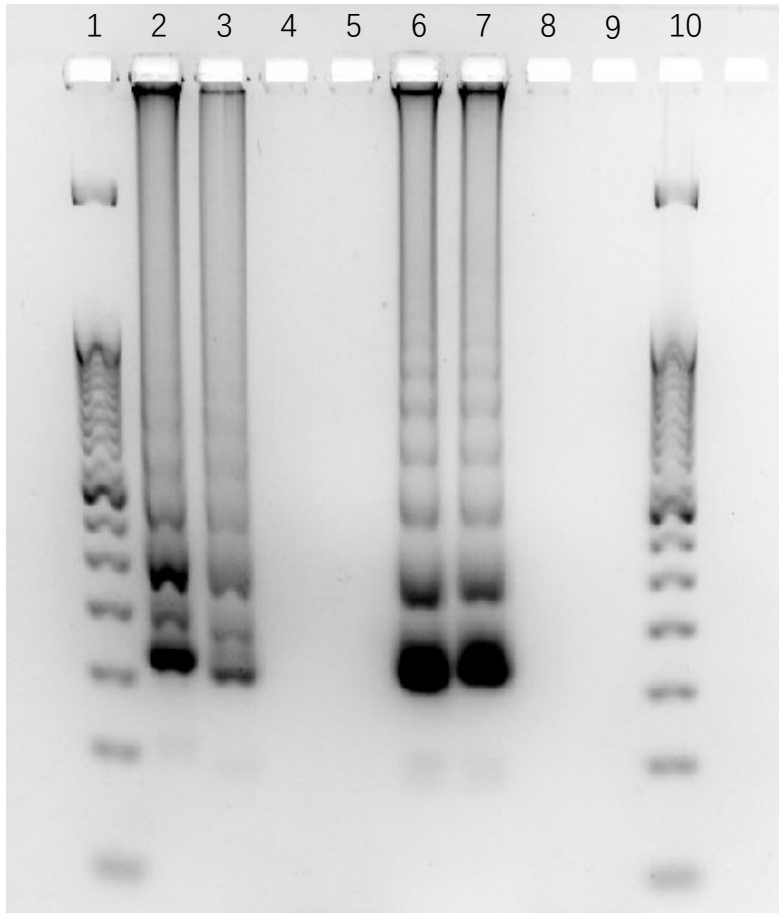

| Lane     | 1            | 2        | 3        | 4      | 5      | 6     | 7     | 8        | 9   | 10           |
|----------|--------------|----------|----------|--------|--------|-------|-------|----------|-----|--------------|
| Primer   | 50 bp ladder | Lambda   | Lambda   | Lambda | Lambda | M13   | M13   | M13      | M13 | 50 bp ladder |
| Template |              | Lambda-1 | Lambda-2 | M13-1  | NC     | M13-1 | M13-2 | Lambda-1 | NC  |              |

**Figure S3** Agarose gel electrophoresis of the RS-dLAMP results. Two sets of primer and template were used to validate the selectivity of the amplification. Primer and template of each lane are listed in the following table.

Lambda primer, Lambda template

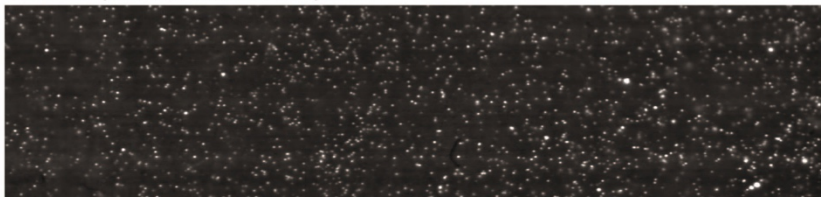

Lambda primer, M13 template

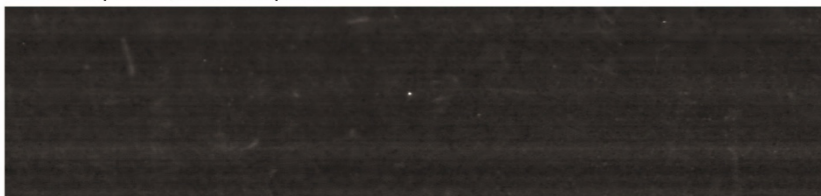

M13 primer, M13 template

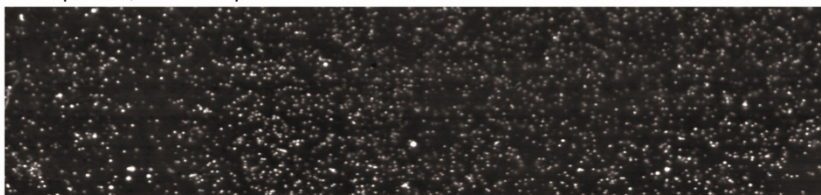

M13 primer, Lambda template

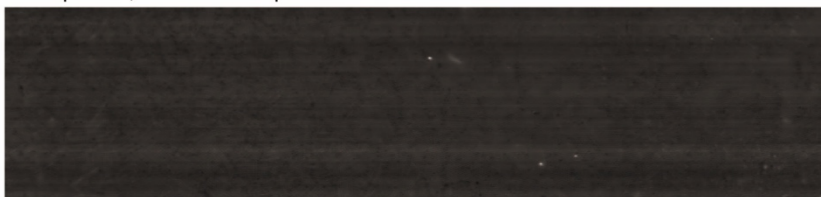

**Figure S4** Specificity of RS-dLAMP. Cross validation of M13/Lambda primer and templates was performed following the RS-dLAMP protocol. The results showed good specificity of both M13 and Lambda primer sets.

**Table S1 Oligo DNA Sequences for LAMP**

| Oligo-DNAs        | Sequence                                            |
|-------------------|-----------------------------------------------------|
| M13 Primer F3     | ACCCCGCTAATCCTAATCCT                                |
| M13 Primer B3     | GGAAAGCGCAGTCTCTGAA                                 |
| M13 Primer FIP    | ATGCCCCCTGCCTATTTTCGGTTTTCTTGAGGAGTCTCAGCCTC<br>T   |
| M13 Primer BIP    | AGGCACTGACCCCGTTAAACTTTTTCCGTTCCAGTAAGCGTC<br>AT    |
| M13 Primer F1c    | ATGCCCCCTGCCTATTTTCGG                               |
| M13 Primer B1c    | AGGCACTGACCCCGTTAAACT                               |
| Lambda Primer F3  | CCCGTGTCTGGTTATTCCAA                                |
| Lambda Primer B3  | CGCCATTAGTGAAACGCTT                                 |
| Lambda Primer FIP | GTTCTCGGCATCACCATCCGTCCTTTTGCTGGGTGTTTATGCCTA<br>CT |
| Lambda Primer BIP | ACCCACGTTGAGCCGACTATTCTTTTGCTGCTTTTTGCCATACC<br>AC  |
| Lambda Primer F1c | GTTCTCGGCATCACCATCCGTC                              |
| Lambda Primer B1c | ACCCACGTTGAGCCGACTATTC                              |

**Table S2 Reagents protocol for LAMP**

| For 100 $\mu$ L 2x premix       | Vol./ $\mu$ L | Stock Conc.  | Final Conc.                    |
|---------------------------------|---------------|--------------|--------------------------------|
| Isothermal Amplification Buffer | 20            | 10x          | 2x                             |
| dNTP                            | 28            | 10 mM each   | 2.8 mM each                    |
| MgSO <sub>4</sub>               | 4             | 100 mM       | 8mM (including 4 mM in Buffer) |
| Bst 3.0 polymerase              | 1             | 120,000 U/mL | 1.2 U/ $\mu$ L                 |
| FIP/BIP                         | 4             | 100 $\mu$ M  | 4 $\mu$ M                      |
| F3/B3                           | 4             | 10 $\mu$ M   | 0.4 $\mu$ M                    |
| F1c/B1c                         | 8             | 10 $\mu$ M   | 0.8 $\mu$ M                    |
| SYTO-9                          | 8             | 100 $\mu$ M  | 8 $\mu$ M                      |
| Nuclease free water             | 7             | --           | --                             |

**Table S3 Oligo DNA sequences for ddPCR**

| Oligo-DNAs         | Sequence                 |
|--------------------|--------------------------|
| M13 Forward Primer | GACCGAAAATGCCGATGAAA     |
| M13 Reverse Primer | CGACAGAATCAAGTTTGCCTTTAG |
| M13 Probe          | 6-FAM-CGCGCTACAGTCTG-MGB |

**Table S4 Reagents protocol for Bio-Rad QX200 ddPCR**

| For 100 $\mu$ L mix                        | Vol./ $\mu$ L | Stock Conc. | Final Conc. |
|--------------------------------------------|---------------|-------------|-------------|
| 2x ddPCR sumpermix<br>for probes (No dUTP) | 50            | 2x          | 1x          |
| M13 Forward Primer                         | 10            | 10 mM       | 1 $\mu$ M   |
| M13 Reverse Primer                         | 10            | 10 mM       | 1 $\mu$ M   |
| M13 Probe                                  | 3             | 10 mM       | 300 nM      |
| Sample                                     | 10            | Variable    | --          |
| Nuclease free water                        | 17            | --          | --          |
